# Supplementary material for: Synergism of 1D/2D boride/MXene nanosheet heterojunctions for boosted overall water splitting
Source: Royal Society of Chemistry journal article supplement (doi:10.1039/d1nj04596b), 2021-01-01
Supplement: d1nj04596b1.pdf [file d1nj04596b1.pdf]

## Synergism of 1D/2D boride/MXene nanosheets heterojunctions for boosted overall water splitting

Xinyu Ding<sup>a#</sup>, Xunyu Wang<sup>a#</sup>, Wenwu Song<sup>a</sup>, Xiaoqing Wei<sup>a</sup>, Jinli Zhu<sup>a\*</sup>, Yanfeng Tang<sup>a,b</sup>, Minmin Wang<sup>a,b\*</sup>

<sup>a</sup> School of Chemistry and Chemical Engineering, Nantong University, Nantong 226019, China

<sup>b</sup> Nantong Key Laboratory of Intelligent and New Energy Materials

\*Corresponding authors' E-mail: [mmwang0528@ntu.edu.cn](mailto:mmwang0528@ntu.edu.cn); [jinlizhu@ntu.edu.cn](mailto:jinlizhu@ntu.edu.cn)

# These authors contributed equally to this work.

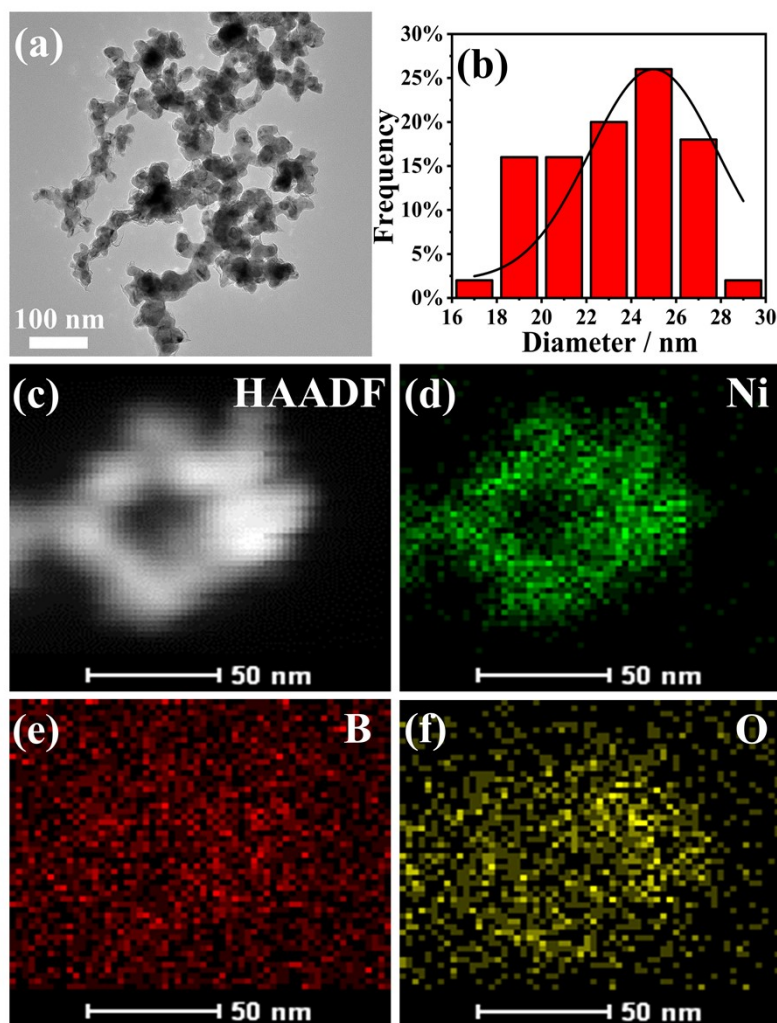

**Figure S1.** (a) TEM images of  $\text{Ni}_x\text{B}$ . (b)  $\text{Ni}_x\text{B}$  nanoparticles size distribution. (c) HAADF image, and (d-f) its corresponding elemental mapping images of  $\text{Ni}_x\text{B}$ .

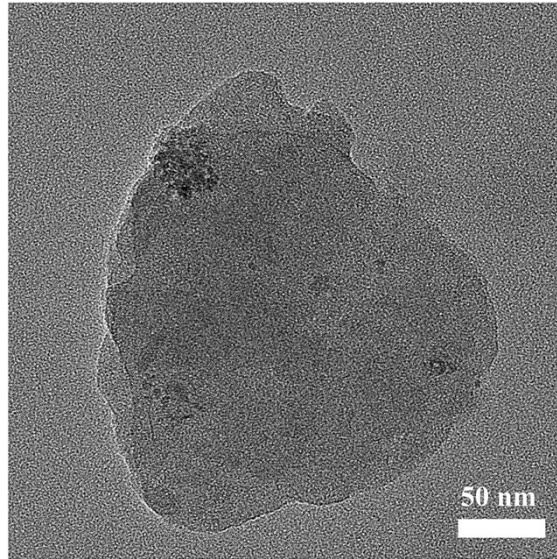

Figure S2. TEM image of N<sub>10</sub>TC nanosheets.

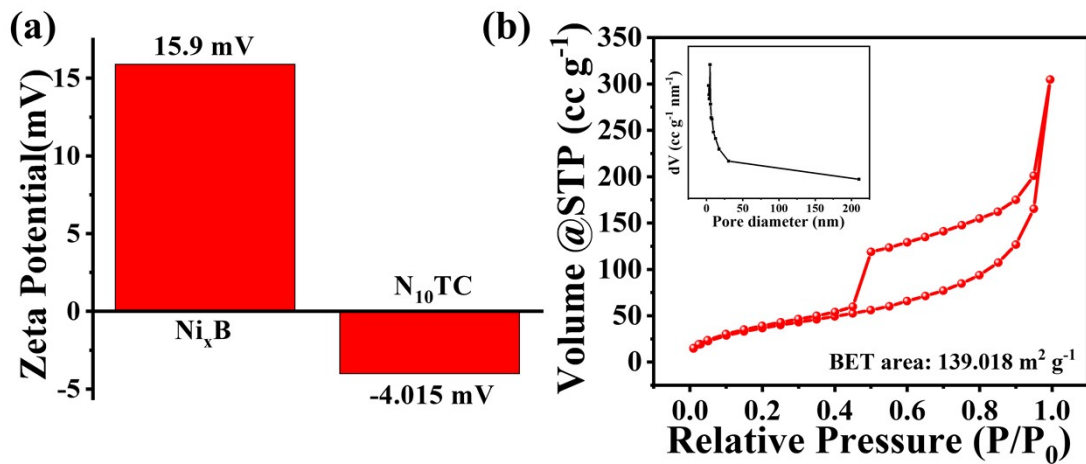

Figure S3. (a) Zeta potentials of Ni<sub>x</sub>B and N<sub>10</sub>TC dispersed in water. (b) N<sub>2</sub>-sorption isotherm of Ni<sub>x</sub>B/N<sub>10</sub>TC, the inset shows the pore size distribution.

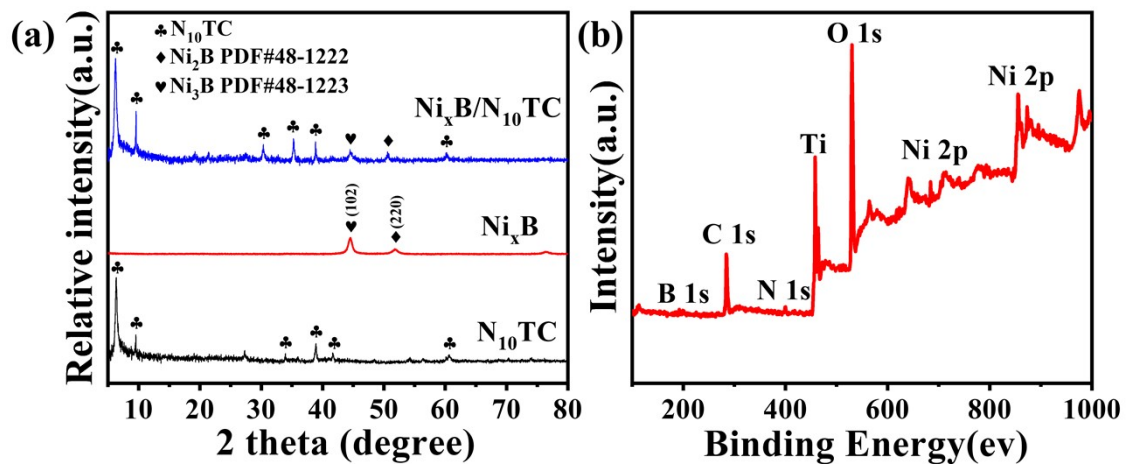

Figure S4. (a) PXRD patterns of Ni<sub>x</sub>B/N<sub>10</sub>TC, Ni<sub>x</sub>B, and N<sub>10</sub>TC. (b) XPS survey spectra of Ni<sub>x</sub>B/N<sub>10</sub>TC.

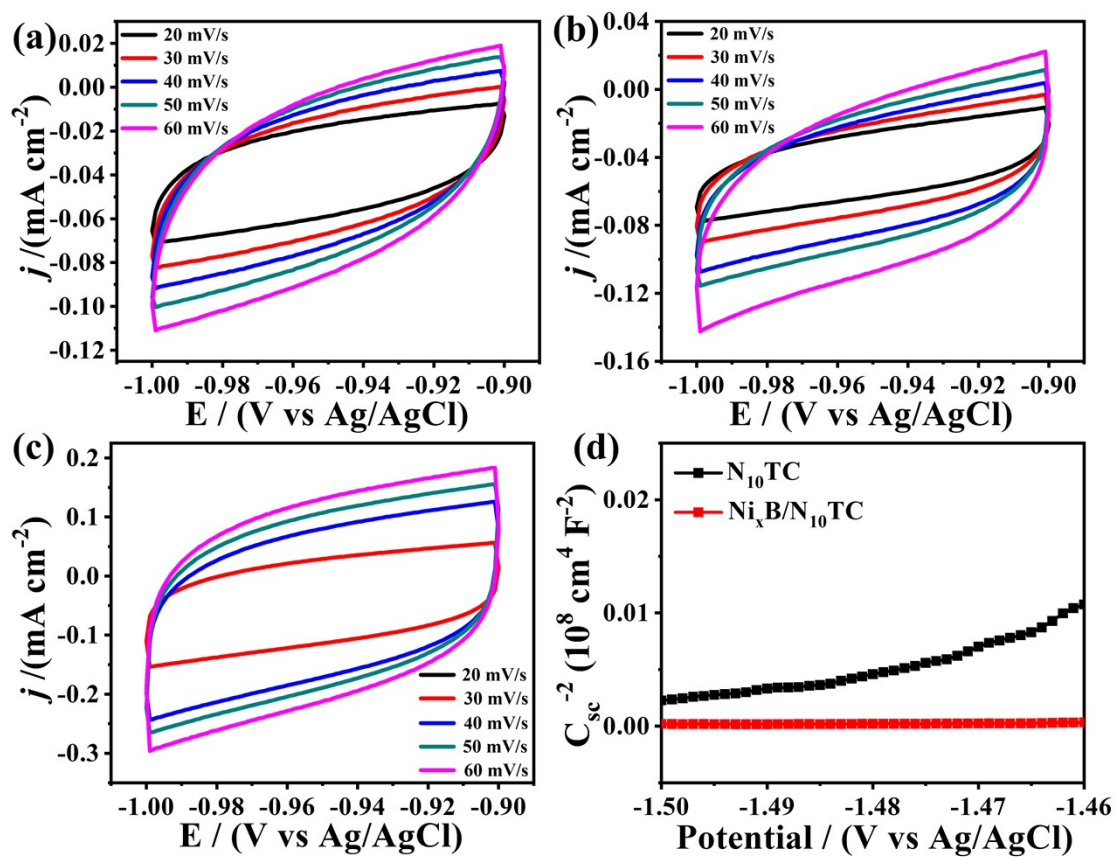

**Figure S5.** Cyclic voltammograms at different scan rate in the region of -0.9 ~ -1 V vs. Ag/AgCl for (a)  $N_{10}TC$ , (b)  $Ni_xB$  and (c)  $Ni_xB/N_{10}TC$ . (d) Mott-Schottky plots for  $N_{10}TC$  and  $Ni_xB/N_{10}TC$  at 1 kHz frequency in 1 M KOH (pH = 14) at room temperature.

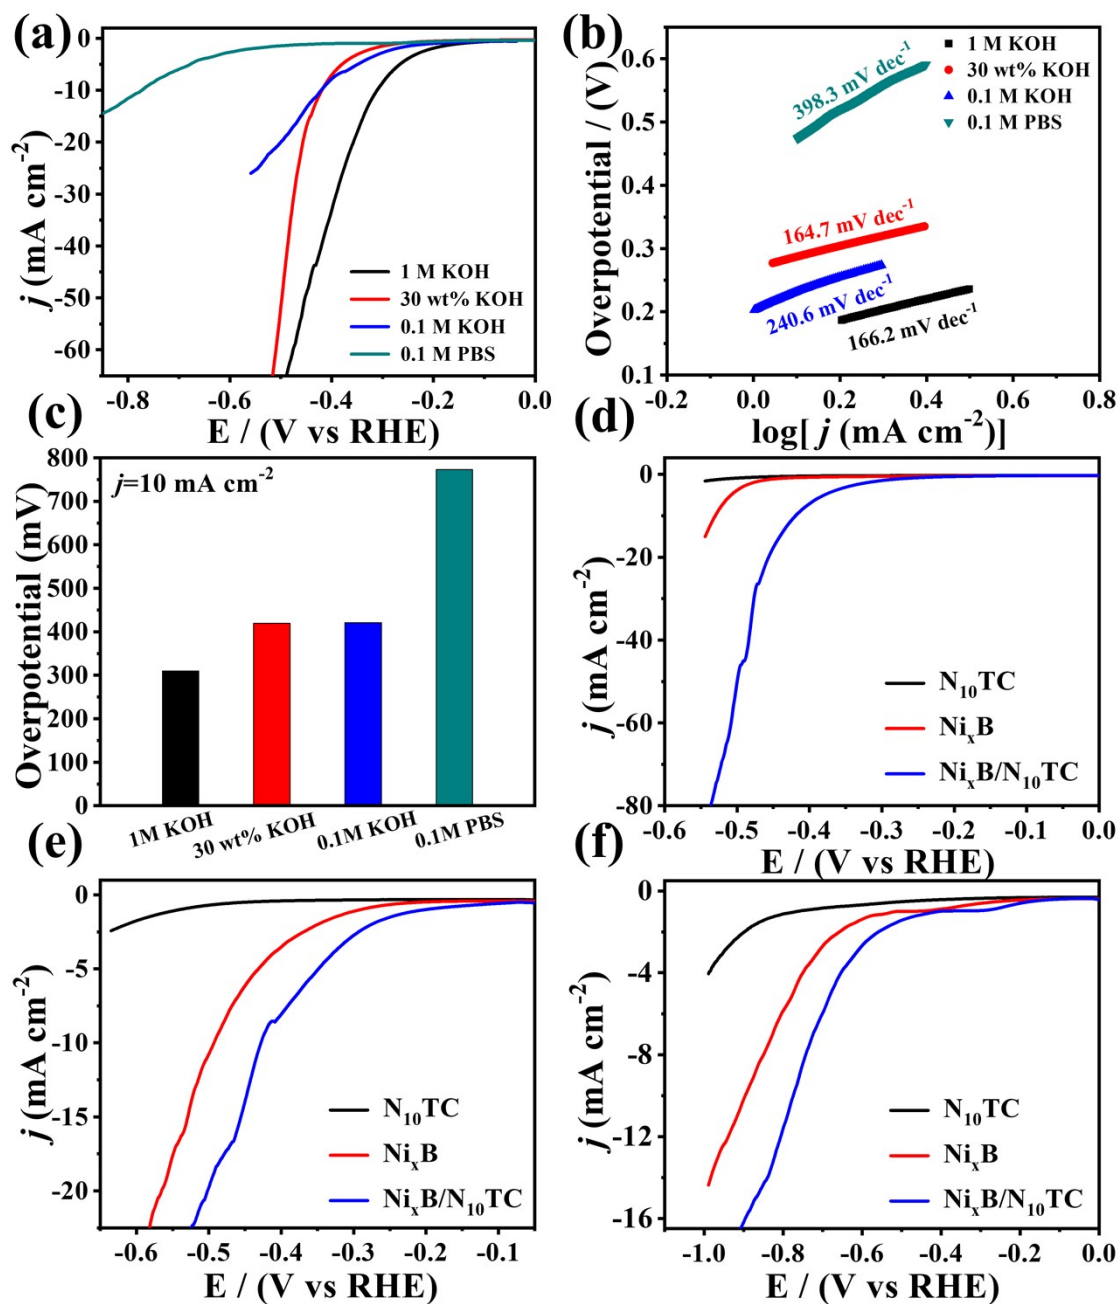

**Figure S6.** (a) HER polarization curves of  $\text{Ni}_x\text{B}/\text{N}_{10}\text{TC}$  in different electrolytes; (b) Tafel slopes and corresponding exchange current density ( $j_0$ ); (c) Overpotentials at 10  $\text{mA cm}^{-2}$  for  $\text{Ni}_x\text{B}/\text{N}_{10}\text{TC}$  electrode in different electrolytes. (d-f) HER polarization curves ( $1 \text{ mV s}^{-1}$ ) of different electrodes in different electrolytes, (d) 30 wt% KOH; (e) 0.1 M KOH; (f) 0.1 M PBS (pH=7) solution.

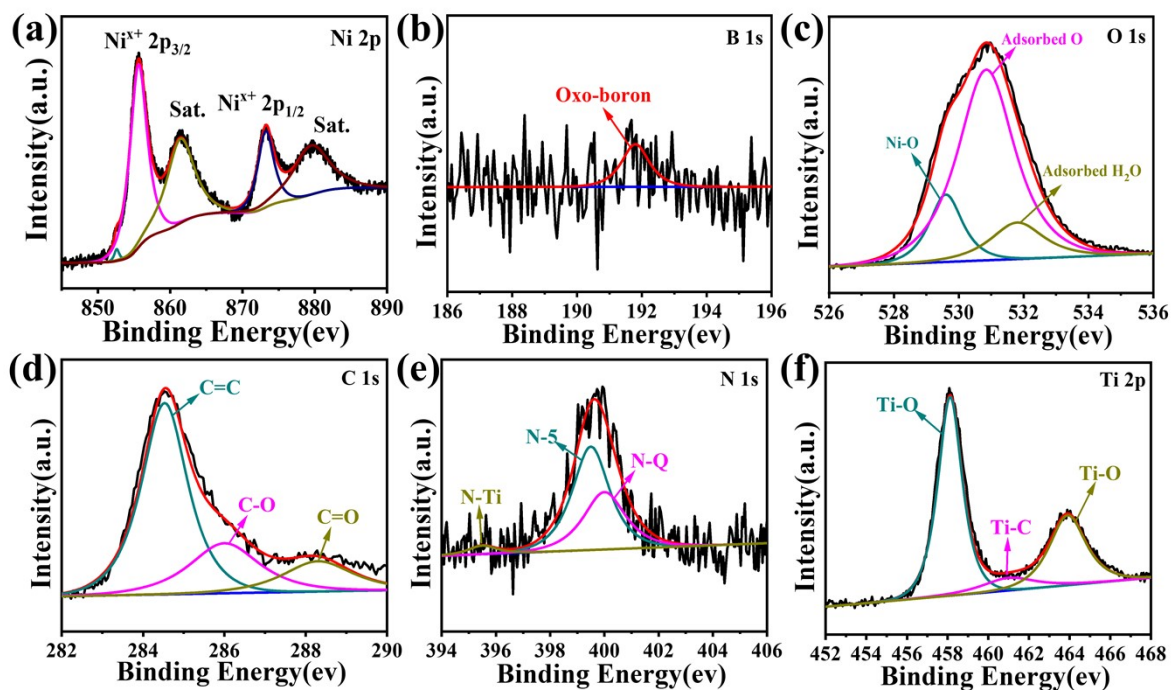

Figure S7. XPS spectra of  $\text{Ni}_x\text{B}/\text{N}_{10}\text{TC}$  heterojunction after 1000 cycles test.

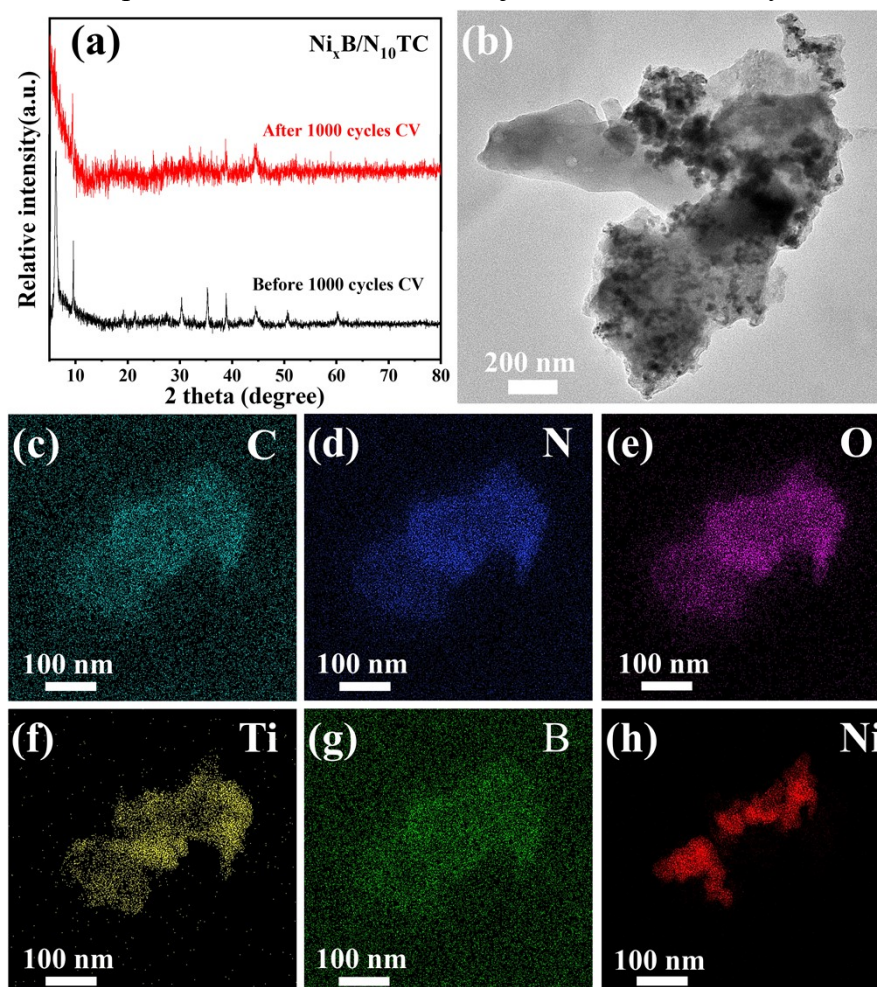

Figure S8. (a) XRD, (b)TEM and (c-h) its corresponding elemental mapping for the sample of  $\text{Ni}_x\text{B}/\text{N}_{10}\text{TC}$  heterojunction after HER stability test.

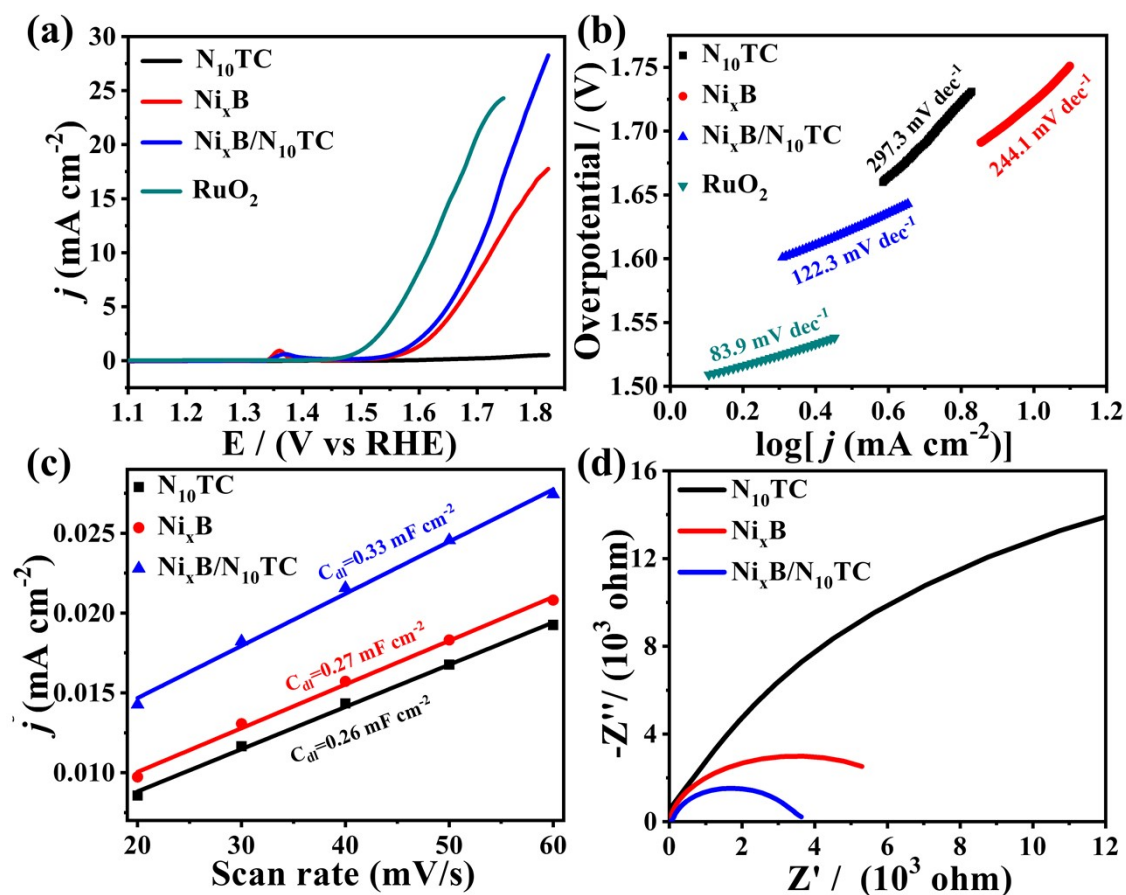

**Figure S9.** (a) Polarization curves with 80% iR-compensation and (b) Tafel plots of  $N_{10}TC$ ,  $Ni_xB$ ,  $Ni_xB/N_{10}TC$ , and commercial  $RuO_2$  for OER in 1.0 M KOH electrolyte. (c)  $C_{dl}$  values estimated in 1.0 M KOH electrolyte. (d) Electrochemical impedance spectroscopy of  $N_{10}TC$ ,  $Ni_xB$ ,  $Ni_xB/N_{10}TC$ .

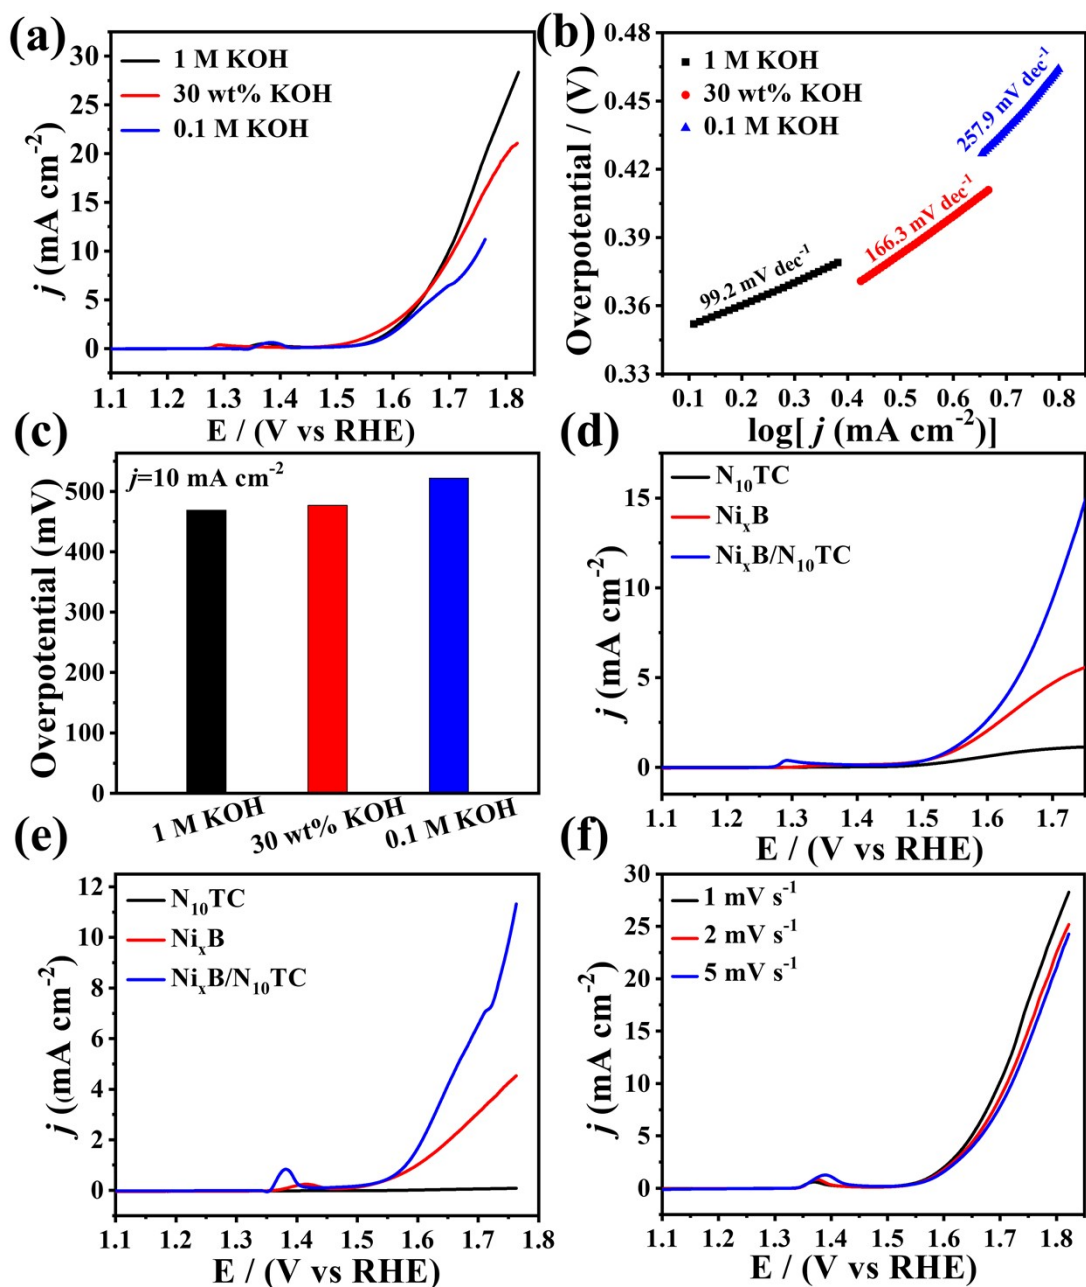

**Figure S10.** (a) OER polarization curves of  $\text{Ni}_x\text{B}/\text{N}_{10}\text{TC}$  in different electrolytes; (b) Tafel slopes and corresponding exchange current density ( $j_0$ ); (c) Overpotentials at 10  $\text{mA cm}^{-2}$  for  $\text{Ni}_x\text{B}/\text{N}_{10}\text{TC}$  electrode in different electrolytes. (d-e) OER polarization curves ( $1 \text{ mV s}^{-1}$ ) of different electrodes in different electrolytes, (d) 30 wt% KOH; (e) 0.1 M KOH. (f) OER polarization curves of  $\text{Ni}_x\text{B}/\text{N}_{10}\text{TC}$  heterojunction under various sweep speeds.

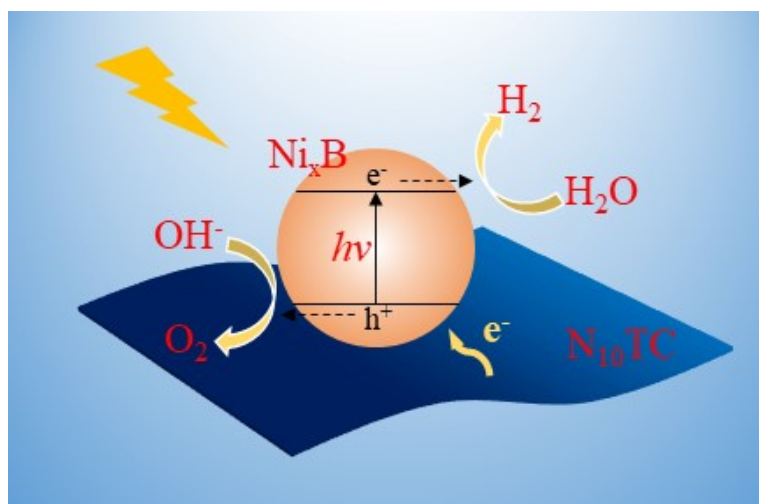

Figure S11 The potential mechanism of the catalysis process.



**Table S1** Comparison of catalytic performance with the most recently reported water-splitting catalysts.

| Catalyst                                            | Substrate used | Electrolyte                          | Loading amount (mg cm <sup>-2</sup> ) | $\eta_{10}$ (mV) |            | A/g          | Ref.                                                                   |
|-----------------------------------------------------|----------------|--------------------------------------|---------------------------------------|------------------|------------|--------------|------------------------------------------------------------------------|
|                                                     |                |                                      |                                       | HER              | OER        |              |                                                                        |
| <b>Ni<sub>x</sub>B/N<sub>10</sub>TC</b>             | <b>GC</b>      | <b>1 M KOH</b>                       | <b>0.11</b>                           | <b>310</b>       | <b>468</b> | <b>90.91</b> | <b><i>This work</i></b>                                                |
| Ni <sub>2</sub> B-gC <sub>3</sub> N <sub>4</sub>    | GC             | 1 M KOH                              | —                                     | 707              | —          | —            | <i>ACS Sustainable Chem. Eng.</i> <b>2018</b> , <i>6</i> , 16198       |
| Ni <sub>x</sub> B-300                               | GC             | 1 M KOH                              | 0.21                                  | —                | 380        | 47.62        | <i>Adv. Energy Mater.</i> <b>2017</b> , <i>7</i> , 1700381             |
| Co <sub>2</sub> B-CoSe <sub>2</sub>                 | GC             | 1 M KOH                              | 0.40                                  | 300              | 320        | 25           | <i>ACS Appl. Mater. Interfaces</i> <b>2017</b> , <i>9</i> , 39312      |
| Etched Mo-Al-B                                      | Unsupport ed   | 0.5 M H <sub>2</sub> SO <sub>4</sub> | —                                     | 361              | —          | —            | <i>Chem. Mater.</i> <b>2017</b> , <i>29</i> , 8953                     |
| MoS <sub>2</sub> /Ti <sub>3</sub> C <sub>2</sub>    | GC             | 0.5 M H <sub>2</sub> SO <sub>4</sub> | 0.35                                  | 280              | —          | 28.57        | <i>Int. J. Hydrogen Energy</i> <b>2019</b> , <i>44</i> , 965-976       |
| NiCoS/Ti <sub>3</sub> C <sub>2</sub> T <sub>x</sub> | GC             | 1 M KOH                              | 0.21                                  | —                | 365        | 47.62        | <i>ACS Appl Mater Interfaces</i> <b>2018</b> , <i>10</i> , 22311-22319 |
